# Supplementary material for: Natural IgG Anti-F (ab’)2 Autoantibody Activity in Children with Autism
Source: MDPI journal article supplement (doi:10.3390/biomedicines11030715), 2023-02-27
Supplement: s1 [file s1]

**Table S1.** Role of Natural Autoantibodies.

| Physiology                                                                                                                                                                                                                                                                                                                                     | Pathology (beneficial and detrimental interference in case of uncontrolled response)                                                                                                                                                                                                                                                                                                                                 |
|------------------------------------------------------------------------------------------------------------------------------------------------------------------------------------------------------------------------------------------------------------------------------------------------------------------------------------------------|----------------------------------------------------------------------------------------------------------------------------------------------------------------------------------------------------------------------------------------------------------------------------------------------------------------------------------------------------------------------------------------------------------------------|
| <p>Host defense</p> <ul style="list-style-type: none"> <li>• Bacteria</li> <li>• Viruses</li> <li>• Other pathogenic agents</li> </ul>                                                                                                                                                                                                         | Inflammation, infection (chronic infection and sepsis), and autoimmune diseases                                                                                                                                                                                                                                                                                                                                      |
| <p>Maintenance of Tissue Homeostasis</p> <ul style="list-style-type: none"> <li>• Clearance of catabolic products, apoptotic and necrotic cells, as well as senescent cells</li> <li>• Anti-tumor activity (tumor-cell clearance)</li> <li>• Modulation of cell functions: catalytic, hormonal, nucleic acids and protein synthesis</li> </ul> | Cancer                                                                                                                                                                                                                                                                                                                                                                                                               |
| <p>Immunomodulation</p> <ul style="list-style-type: none"> <li>• Cytokines</li> <li>• Dendritic, B and T cells</li> <li>• Presentation of antigens to T cells</li> <li>• Granulocytes</li> <li>• Bridge innate and adaptive immune responses</li> </ul>                                                                                        | <p>Cardiovascular diseases</p> <ul style="list-style-type: none"> <li>• detrimental IgG anti-phosphorylcholine antibodies and protective IgM</li> </ul> <p>Neurodegenerative diseases</p> <ul style="list-style-type: none"> <li>• Remyelination and neurite extension</li> <li>• Recognition of beta-amyloid degradation products</li> <li>• Recognition of beta-integrins</li> </ul> <p>Tissue transplantation</p> |
